# Supplementary material for: Copper Ion Genetic Biosensor: A Synthetic Biology Approach for Environmental Heavy Metal Detection
Source: Research Square preprint supplement (doi:10.21203/rs.3.rs-7066326/v1), 2025-07-25
Supplement: Supplementary file 1 [file 6f9b70102099dbbdcd6dcd2a.docx]

No gels or blots were generated or analyzed in this study.
